# Supplementary material
Source: PubMed Central journal article supplement (PMC2827957)

Supplemental Table 1. Demographics and case information for the 61 Vanderbilt Medical Center patients (test dataset) represented by 6 adenomas and 55 adenocarcinoma patients. The Vanderbilt test set included 15 patients from the University of Alabama-Birmingham Medical Center (one adenoma and 14 tumors provided by Martin J. Heslin, M.D.). All patients were diagnosed with adenoma or colorectal adenocarcinoma (Stages I-IV) according to current American Joint Commission on Cancer (AJCC) guidelines. *Other* in the VMC medical record implies not otherwise specified or Asian.

| <b>Supplementary Table 1</b><br><i>VMC Demographics</i> | <i>VMC-adenomas</i> | <i>VMC-adenocarcinomas</i> |
|---------------------------------------------------------|---------------------|----------------------------|
| <b>Sample size</b>                                      | <b>6</b>            | <b>55</b>                  |
| <b>Mean Age (s.d.)</b>                                  | <b>61.7 (15.2)</b>  | <b>62.3 (14.1)</b>         |
| <b>Sex (%male)</b>                                      | <b>2 (33.3%)</b>    | <b>30 (54.5%)</b>          |
| <b>Stage I</b>                                          | <b>n/a</b>          | <b>4 (7.3%)</b>            |
| <b>Stage II</b>                                         | <b>n/a</b>          | <b>15 (27.3%)</b>          |
| <b>Stage III</b>                                        | <b>n/a</b>          | <b>19 (34.5%)</b>          |
| <b>Stage IV</b>                                         | <b>n/a</b>          | <b>17 (30.9%)</b>          |
| <b>Median Follow-up Months (Min - Max)</b>              | <b>n/a</b>          | <b>50.2 (0.4 - 111.3)</b>  |
| <b>Number of deaths</b>                                 | <b>n/a</b>          | <b>20 (36.3%)</b>          |
| <b>Caucasian (%)</b>                                    | <b>5 (83.3%)</b>    | <b>50 (90.9%)</b>          |
| <b>Black (%)</b>                                        | <b>0 (0%)</b>       | <b>4 (7.3%)</b>            |
| <b>Other (%)</b>                                        | <b>1 (16.7%)</b>    | <b>1 (1.8%)</b>            |

Supplemental Table 2. Intestinal polyp development in Min mice with los of Rab25

| Rab25 | No. of Mice | No. of polyps/mouse |             |             |              | Colon     |
|-------|-------------|---------------------|-------------|-------------|--------------|-----------|
|       |             | Small Intestine     |             |             | Total        |           |
|       |             | Proximal            | Middle      | Distal      |              |           |
| +/+   | 7           | 7.4 ±0.9            | 12.6±5.5    | 25.4±3.7    | 45.4±5.1     | 1.9±0.5   |
| +/-   | 16          | 13.9±2.4            | 38.9±5.1**  | 45.8±4.2*   | 98.5±9.2**   | 3.5±0.6   |
| -/-   | 12          | 20.7±3.1**          | 60.1±1.6*** | 94.3±7.8*** | 175.0±9.4*** | 4.7±0.8** |

Supplement Table 3: Primers for Mouse Genotyping

|                    |          |                         |  |
|--------------------|----------|-------------------------|--|
|                    |          |                         |  |
| Rab25              | NEO-NM32 | TCTATCGCCTTCTTGACGAGTTC |  |
|                    | R25KO-S  | TCCCCTCAGTGTCTCTGCCAG   |  |
|                    | R25KO-AS | GGGAACACACGGCAGAGTCTC   |  |
| Apc <sup>Min</sup> | oIMR0033 | GCCATCCCTTCACGTTAG      |  |
|                    | oIMR0034 | TTCCACTTTGGCATAAGGC     |  |
|                    | oIMR0758 | TTCTGAGAAAGACAGAAGTTA   |  |
| Smad3              | 489      | TGGACTTAGGAGACGGCAGTCC  |  |
|                    | 490      | CTTCTGAGACCCTCCTGAGTAGG |  |
|                    | 542      | CTCTAGAGCGGCCTACGTTTGG  |  |

Supplemental Figure 1. **Expression of Rab25 protein in normal C57BL/6 mouse tissues by immunohistochemistry using anti-Rab25 antibodies.** **A.** Skin **B.** Higher magnification views of A **C.** Dorsal surface of tongue **D.** Esophagus **E.** Kidney (collecting duct) **F.** Stomach (fundus) Bar=50  $\mu$ m.

Supplemental Fig. 1

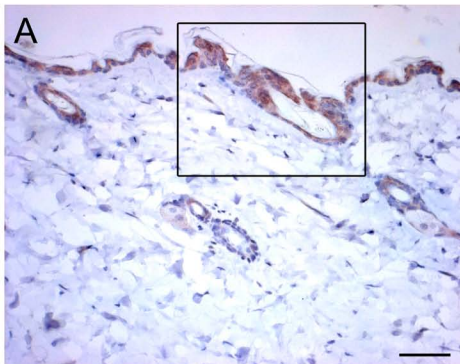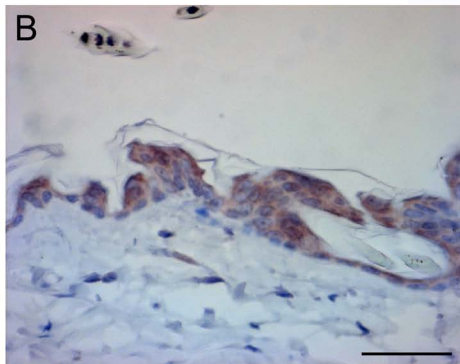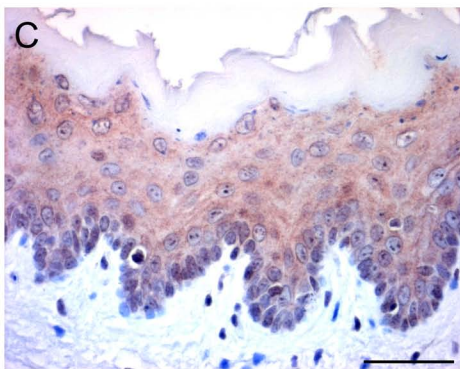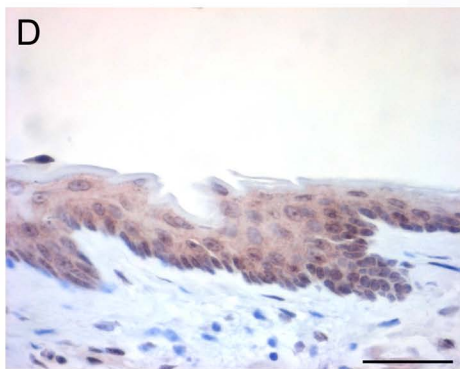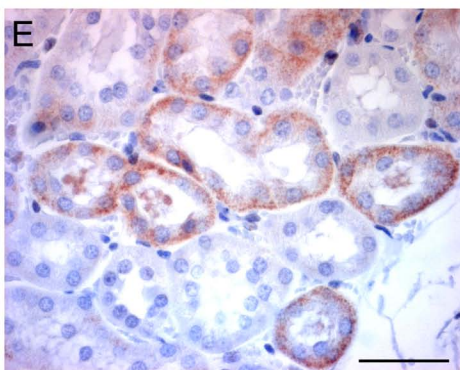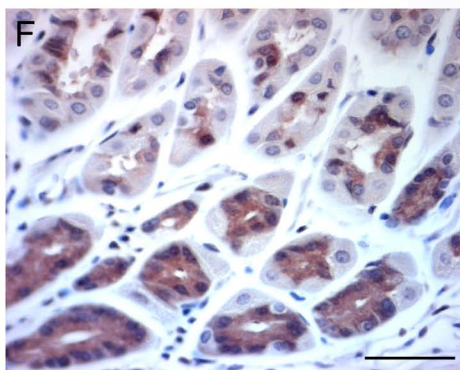

Supplement: JCI40728sd.pdf [file JCI40728sd.pdf]
